# Supplementary material for: Evaluation of Different Cleaning Strategies for Removal of Contaminating DNA Molecules
Source: MDPI journal article supplement (doi:10.3390/genes13010162), 2022-01-17
Supplement: s1 [file s1]

**Table S1.** Overview of the cleaning strategies. The product name (current name, if applicable), active compound, manufacturer, dilution used in the study, storage method, application method, price and health risks are listed. The price per liter for each agent is expressed in USD based on the available price on the Swedish market).

| Cleaning Agent                                             | Active Compound                                        | Manufacturer                                                                                    | Dilution                                                       | Storage                                                                                             | Application                                                                                                        | Price per Liter (USD)                      | Hazards                                                                                                                                             |
|------------------------------------------------------------|--------------------------------------------------------|-------------------------------------------------------------------------------------------------|----------------------------------------------------------------|-----------------------------------------------------------------------------------------------------|--------------------------------------------------------------------------------------------------------------------|--------------------------------------------|-----------------------------------------------------------------------------------------------------------------------------------------------------|
| <b>Aqueous Ethanol</b>                                     | 99.5% Absolut Finsprit                                 | Kemetyl (Haninge, Sweden)                                                                       | 70% in aqueous solution                                        | Stored in a trigger spray bottle at room temperature                                                | Sprayed once and wiped with a paper towel                                                                          | \$19.37                                    | H225<br>                                                         |
| <b>UV Radiation</b>                                        | Philips TUV, UV-C, 30W/G30 T8                          | Koninklijke Philips N.V. (Amsterdam, The Netherlands)                                           | Not applicable                                                 | Not applicable                                                                                      | Radiation for 20 min at 254 nm at a distance of 60–70 cm                                                           | Not applicable                             | Can cause severe injury to skin and eyes                                                                                                            |
| <b>Aqueous Ethanol and UV Radiation</b>                    | 99.5% Absolut Finsprit + Philips TUV, UV-C, 30W/G30 T8 | Ethanol: Kemetyl (Haninge, Sweden)<br>UV: Koninklijke Philips N.V. (Amsterdam, The Netherlands) | 70% in aqueous solution                                        | Stored in a trigger spray bottle at room temperature                                                | Ethanol: sprayed once and wiped with a paper towel<br>UV: radiation for 20 min at 254 nm at a distance of 60–70 cm | Ethanol: \$19.37<br><br>UV: not applicable | Ethanol: H225<br><br>UV: Can cause severe injury to skin and eye |
| <b>Freshly Prepared Household Bleach (Klorin Original)</b> | 3.6% Sodium hypochlorite in water                      | Colgate-Palmolive AB (Danderyd, Sweden)                                                         | 15% resulting in 0.54% sodium hypochlorite in aqueous solution | Freshly prepared each day used; Stored in a trigger spray bottle at room temperature                | Sprayed once and wiped with paper towel                                                                            | \$0.51                                     | H290, H315, H318, H400, H411                                                                                                                        |
| <b>Stored Household Bleach</b>                             | 2.7% Sodium hypochlorite in water                      | Colgate-Palmolive AB (Danderyd, Sweden)                                                         | 15% resulting in 0.4% sodium hypochlorite in aqueous solution  | Prepared 70–80 days before use; stored in a small glass bottle at 8°C in darkness; transferred to a | Sprayed once and wiped with paper towel                                                                            | \$0.51                                     | H290, H315, H318, H400, H411                                                                                                                        |

|                                                                                        |                                                                               |                                                 |                                              |                                                                                      |                                                                                        |         |                                                                                                                                                                                             |
|----------------------------------------------------------------------------------------|-------------------------------------------------------------------------------|-------------------------------------------------|----------------------------------------------|--------------------------------------------------------------------------------------|----------------------------------------------------------------------------------------|---------|---------------------------------------------------------------------------------------------------------------------------------------------------------------------------------------------|
|                                                                                        |                                                                               |                                                 |                                              | trigger spray bottle for further storage                                             |                                                                                        |         |                                                                                                                                                                                             |
| <b>DAX Ytdesinfektion Plus</b>                                                         | 400 g/kg Propan-2-ol                                                          | CCS Hygien A/S (Malmö, Sweden)                  | Ready-to-use solution                        | Stored in a trigger spray bottle at room temperature                                 | Sprayed once and wiped with a paper towel                                              | \$3.33  | H226, H319, H336<br>  |
| <b>Rely+On™ Virkon®</b>                                                                | Pentapotassium bis(peroxymonosulphate) bis(sulphate) (40–55%)                 | Antec International Ltd (Sudbury/Suffolk, U.K.) | 1% in aqueous solution                       | Stored in a trigger spray bottle at room temperature                                 | Sprayed once and wiped with a paper towel                                              | \$2.64  | H315, H318, H412                                                                                                                                                                            |
| <b>Trigene® Disinfectant Cleaner (Distel™ High-Level Medical Surface Disinfectant)</b> | < 2.3 g/kg didecyl dimethyl ammonium chloride                                 | Tristel Solutions Ltd (Snailwell, U.K.)         | 10% in aqueous solution                      | Freshly prepared each day used; Stored in a trigger spray bottle at room temperature | Sprayed once and left for 10 min; sprayed once with water and wiped with a paper towel | \$1.40  | H302, H314, H315, H317, H318, H400<br>                                                                   |
| <b>DNA Remover® (PCR Clean™)</b>                                                       | Ethoxylated alcohols, C12–14                                                  | Minerva Biolabs GmbH (Berlin, Germany)          | Ready-to-use solution                        | Stored in a trigger spray bottle at room temperature                                 | Sprayed once and wiped with a paper towel                                              | \$52.18 | H302, H318, H400                                                                                                                                                                            |
| <b>Sodium Hypochlorite</b>                                                             | Sodium hypochlorite (3.5% Cl <sub>2</sub> ) in GPR Rectapur® aqueous solution | VWR International (Radnor, Pennsylvania, U.S.)  | 0.4% sodium hypochlorite in aqueous solution | Freshly prepared each day used; Stored in a trigger spray bottle at room temperature | Sprayed once and wiped with a paper towel                                              | \$2.44  | H290, H314, EUH031<br>                                                                                  |

Legend H-sentences:

|                                               |                                         |
|-----------------------------------------------|-----------------------------------------|
| H225: Highly flammable liquid and vapour      | H226: Flammable liquid and vapour       |
| H290: May be corrosive to metals              | H302: Harmful if swallowed              |
| H314: Causes severe skin burns and eye damage | H315: Causes skin irritation            |
| H317: May cause an allergic skin reaction     | H318: Causes severe eye damage          |
| H319: Causes serious eye irritation           | H336: May cause drowsiness or dizziness |

|                                  |                                                |
|----------------------------------|------------------------------------------------|
| H400: Very toxic to aquatic life | H411: Toxic to aquatic life                    |
| H412: Harmful to aquatic life    | EUH031: Contact with acids liberates toxic gas |
