# Supplementary material for: Evaluation of Different Cleaning Strategies for Removal of Contaminating DNA Molecules
Source: Genes (Basel). 2022 Jan 17;13(1):162. doi: 10.3390/genes13010162 (PMC8775027; doi:10.3390/genes13010162)
Supplement: Supplementary file 1 [file genes-13-00162-s001.zip › Supplementary_Table S2_20211230.xlsx]

## Sheet: Data CF-DNA mtDNA in copies
Table S2.1. Representation of all mtDNA data expressed in copy numbers (in 100 µL DNA extract), means and standard deviations after depositing cell-free DNA, organised according the different cleaning agents and the different surfaces. Outliers were determined (indicated in red).
		mtDNA copies																Table S2.2. Overview of the number of replicates used for the analysis per category for cell-free DNA when removing outliers.
		PLASTIC					METAL					WOOD
Cleaning agent	Replicate	Copies (n)	Determination of outliers		Mean (n)	SD (n)	Copies (n)	Determination of outliers		Mean (n)	SD (n)	Copies (n)	Determination of outliers		Mean (n)	SD (n)		Replicates used for analysis
No-treatment controls			Q1	7445000	9.39667e+06	4.07463e+06		Q1	4172000	5.70133e+06	4.39575e+06		Q1	3759000	4.79267e+06	3.52889e+06		Agent	Plastic	Metal	Wood
	1	9720000	Q3	11510000			7680000	Q3	8220000			6860000	Q3	6830000				No-treatment controls	3	3	3
	2	5170000	IQR	4065000			664000	IQR	4048000			6800000	IQR	3071000				EtOH	5	3	5
	3	13300000	Upper Bound	17607500			8760000	Upper Bound	14292000			718000	Upper Bound	11436500				UV	5	5	5
			Lower Bound	1347500				Lower Bound	-1900000				Lower Bound	-847500				EtOH+UV	5	3	5
EtOH	1	21200	Q1	23000	131640	120771	271000	Q1	610000	655333	78519.6	10100	Q1	29100	63460	45714.3		Fresh bleach	4	4	4
	2	23000	Q3	156000			610000	Q3	746000			29100	Q3	91500				Stored bleach	4	5	4
	3	143000	IQR	133000			610000	IQR	136000			63600	IQR	62400				DAX Ytdesinf, Plus	5	4	5
	4	156000	Upper Bound	355500			746000	Upper Bound	950000			91500	Upper Bound	185100				Virkon®	5	4	5
	5	315000	Lower Bound	-176500			1020000	Lower Bound	406000			123000	Lower Bound	-64500				DNA Remover®	3	5	4
UV	1	666000	Q1	994000	1136000	361494	335	Q1	81200	115507	84110.4	2420000	Q1	2470000	3500000	1.53077e+06		Trigene®	4	4	4
	2	994000	Q3	1340000			81200	Q3	183000			2470000	Q3	4020000				Sodium hypochlorite	5	4	4
	3	1060000	IQR	346000			102000	IQR	101800			2620000	IQR	1550000				Background controls	3	3	3
	4	1340000	Upper Bound	1859000			183000	Upper Bound	335700			4020000	Upper Bound	6345000
	5	1620000	Lower Bound	475000			211000	Lower Bound	-71500			5970000	Lower Bound	145000
EtOH+UV	1	1720	Q1	2720	4724	3019.72	31900	Q1	40800	42566.7	1569.5	5400	Q1	5600	11480	8569.25
	2	2720	Q3	6450			40800	Q3	43800			5600	Q3	13600
	3	3620	IQR	3730			43100	IQR	3000			7200	IQR	8000				Table S2.3. Summarising table with the mean and standard deviation per category in mtDNA copies as well as the yield in % of cell-free DNA left on the surface compared to the no-treatment controls. The data is presented with outliers removed.
	4	6450	Upper Bound	12045			43800	Upper Bound	48300			13600	Upper Bound	25600
	5	9110	Lower Bound	-2875			151000	Lower Bound	36300			25600	Lower Bound	-6400				Cell-free DNA	PLASTIC			METAL			WOOD
Fresh bleach	1	126	Q1	377	1990.75	2900.5	0	Q1	0	22.75	29.7111	5250	Q1	11500	15312.5	8442.98		Cleaning agent	Mean	SD	Yield	Mean	SD	Yield	Mean	SD	Yield
	2	377	Q3	6290			0	Q3	62.5			11500	Q3	23200				No-treatment controls	9396667*	4.07463e+06		5701333*	4.39575e+06		4792667*	3.52889e+06
	3	1170	IQR	5913			28.5	IQR	62.5			21300	IQR	11700				EtOH	131640***	120771	0.0140092	655333*	78519.6	0.113747	63460***	45714.3	0.0132411
	4	6290	Upper Bound	15159.5			62.5	Upper Bound	156.25			23200	Upper Bound	40750				UV	1136000***	361494	0.120894	115507***	84110.4	0.0200487	3500000***	1.53077e+06	0.730282
	5	26800	Lower Bound	-8492.5			3300	Lower Bound	-93.75			62800	Lower Bound	-6050				EtOH+UV	4724***	3019.72	0.000502725	42567*	1569.5	0.00738835	11480***	8569.25	0.00239529
Stored bleach	1	51.8	Q1	327	918.2	1237.7	0	Q1	16.3	84.6	77.355	47.1	Q1	330	4336.77	5040.02		Fresh bleach	1991**	2900.5	0.000211849	23**	29.7111	3.93034e-06	15313**	8442.98	0.00319495
	2	327	Q3	2750			16.3	Q3	154			330	Q3	10400				Stored bleach	918**	1237.7	0.0001	85***	77.355	1.4681e-05	4337**	5040.02	0.000904853
	3	544	IQR	2423			82.7	IQR	137.7			6570	IQR	10070				DAX Ytdesinfektion Plus	1399800***	1.35742e+06	0.148968	1108198**	812671	0.192351	486000***	252391	0.101405
	4	2750	Upper Bound	6384.5			154	Upper Bound	360.55			10400	Upper Bound	25505				Virkon®	188720***	75615.4	0.0200837	123350**	77648.5	0.02141	201400***	84417.4	0.0420225
	5	8890	Lower Bound	-3307.5			170	Lower Bound	-190.25			78000	Lower Bound	-14775				DNA Remover®	304333*	3055.05	0.0323874	149910***	142169	0.02602	416000**	265640	0.0867993
DAX Ytdesinf, Plus	1	110000	Q1	690000	1399800	1.35742e+06	2790	Q1	1000000	1.1082e+06	812671	187000	Q1	319000	486000	252391		Trigene®	4223**	4026.25	0.000449426	970**	1656.74	0.000168311	0**	0	0
	2	690000	Q3	2020000			1000000	Q3	1790000			319000	Q3	727000				Sodium hypochlorite	199***	151.246	2.11211e-05	0**	0	0	8**	15.8	1.66755e-06
	3	699000	IQR	1330000			1640000	IQR	790000			434000	IQR	408000				Background controls	15*	26		37*	65		354*	352
	4	2020000	Upper Bound	4015000			1790000	Upper Bound	2975000			727000	Upper Bound	1339000
	5	3480000	Lower Bound	-1305000			3240000	Lower Bound	-185000			763000	Lower Bound	-293000				NOTE - number of replicates used for calculating the mean
Virkon®	1	93600	Q1	160000	188720	75615.4	17400	Q1	114000	123350	77648.5	116000	Q1	136000	201400	84417.4		*	3 replicates
	2	160000	Q3	237000			114000	Q3	189000			136000	Q3	285000				**	4 replicates
	3	164000	IQR	77000			173000	IQR	75000			173000	IQR	149000				***	5 replicates
	4	237000	Upper Bound	352500			189000	Upper Bound	301500			285000	Upper Bound	508500
	5	289000	Lower Bound	44500			352000	Lower Bound	1500			297000	Lower Bound	-87500
DNA Remover®	1	214000	Q1	301000	304333	3055.05	4250	Q1	53300	149910	142169	176000	Q1	258000	416000	265640
	2	301000	Q3	307000			53300	Q3	243000			258000	Q3	773000
	3	305000	IQR	6000			101000	IQR	189700			457000	IQR	515000				Table S2.4. Summarising table with the mean and standard deviation per category in mtDNA copies as well as the yield in % of cell-free DNA left on the surface compared to the no-treatment controls. All data is included (no outliers removed).
	4	307000	Upper Bound	316000			243000	Upper Bound	527550			773000	Upper Bound	1545500
	5	406000	Lower Bound	292000			348000	Lower Bound	-231250			1640000	Lower Bound	-514500				Cell-free DNA	PLASTIC			METAL			WOOD
Trigene®	1	283	Q1	1450	4223.25	4026.25	0	Q1	187	969.75	1656.74	0	Q1	0	0	0		Cleaning agent	Mean	SD	Yield	Mean	SD	Yield	Mean	SD	Yield
	2	1450	Q3	8780			187	Q3	3450			0	Q3	0				No-treatment controls	9396667	4.07463e+06		5701333	4.39575e+06		4792667	3.52889e+06
	3	6380	IQR	7330			242	IQR	3263			0	IQR	0				EtOH	131640	120771	0.0140092	651400	270623	0.114347	63460	45714.3	0.0132411
	4	8780	Upper Bound	19775			3450	Upper Bound	8344.5			0	Upper Bound	0				UV	1136000	361494	0.120894	115507	84110.4	0.0203	3500000	1.53077e+06	0.730282
	5	20800	Lower Bound	-9545			13700	Lower Bound	-4707.5			250	Lower Bound	0				EtOH+UV	4724	3019.72	0.000502725	62120	49912	0.0109	11480	8569.25	0.00239529
Sodium hypochlorite	1	0	Q1	138	198.6	151.246	0	Q1	0	0	0	0	Q1	0	7.9	15.8		Fresh bleach	6952.6	11375.8	0.0007	678.2	1465.86	0.0001	24810	22460.5	0.0052
	2	138	Q3	315			0	Q3	0			0	Q3	31.6				Stored bleach	2512.56	3722.75	0.0003	85	77.355	1.4681e-05	19069.4	33231.1	0.004
	3	159	IQR	177			0	IQR	0			0	IQR	31.6				DAX Ytdesinfektion Plus	1399800	1.35742e+06	0.148968	1534558	1.18501e+06	26,92%*	486000	252391	0.101405
	4	315	Upper Bound	580.5			0	Upper Bound	0			31.6	Upper Bound	79				Virkon®	188720	75615.4	0.0200837	169080	122385	0.0297	201400	84417.4	0.0420225
	5	381	Lower Bound	-127.5			651	Lower Bound	0			131	Lower Bound	-47.4				DNA Remover®	306600	67987.5	3.26%	149910	142169	0.0263	660800	593767	13,79%*
Background controls			Q1	0	15.1	26.154		Q1	0	37.3333	64.6632		Q1	168.95	354.3	352.283		Trigene®	7538.6	8192.42	0.0008	3515.8	5871.15	0.0006	50	111.803	0
	1	45.3	Q3	22.65			112	Q3	56			314	Q3	519.5				Sodium hypochlorite	199	151.246	2.11211e-05	130.2	291.136	0	32.52	56.727	1.66755e-06
	2	0	IQR	22.65			0	IQR	56			725	IQR	350.55				Background controls	15	26		37	65		354	352
	3	0	Upper Bound	56.625			0	Upper Bound	140			23.9	Upper Bound	1045.32
			Lower Bound	-33.975				Lower Bound	-84				Lower Bound	-356.875				* Difference between data with and without outliers were observed.
