# Supplementary material for: Evaluation of Different Cleaning Strategies for Removal of Contaminating DNA Molecules
Source: Genes (Basel). 2022 Jan 17;13(1):162. doi: 10.3390/genes13010162 (PMC8775027; doi:10.3390/genes13010162)
Supplement: Supplementary file 1 [file genes-13-00162-s001.zip › Supplementary_Table S3__20211230.xlsx]

## Sheet: Data Blood mtDNA in copies
Table S3.1. Representation of all mtDNA data expressed in copy numbers (in 100 µL DNA extract), means and standard deviations after depositing blood, organised according the different cleaning agents and the different surfaces. Outliers were determined (indicated in red).
		mtDNA copies																Table S3.2. Overview of the number of replicates used for the analysis per category for blood when removing outliers.
		PLASTIC					METAL					WOOD
Cleaning agent	Replicate	Copies (n)	Determination of outliers		Mean (n)	SD (n)	Copies (n)	Determination of outliers		Mean (n)	SD (n)	Copies (n)	Determination of outliers		Mean (n)	SD (n)		Replicates used for analysis
No-treatment controls			Q1	682500	720000	66143.8		Q1	448500	607667	345048		Q1	396000	469333	150111		Agent	Plastic	Metal	Wood
	1	695000	Q3	745000			241000	Q3	791000			316000	Q3	546000				No-treatment controls	3	3	3
	2	795000	IQR	62500			926000	IQR	342500			616000	IQR	150000				EtOH	5	5	5
	3	670000	Upper Bound	838750			656000	Upper Bound	1304750			476000	Upper Bound	771000				UV	5	5	5
			Lower Bound	588750				Lower Bound	-65250				Lower Bound	171000				EtOH+UV	5	4	5
EtOH	1	111000	Q1	162000	198200	67277	288	Q1	24200	170078	235148	225000	Q1	232000	330600	108933		Fresh bleach	4	4	5
	2	162000	Q3	256000			24200	Q3	249000			232000	Q3	383000				Stored bleach	3	4	5
	3	188000	IQR	94000			26900	IQR	224800			328000	IQR	151000				DAX Ytdesinf, Plus	5	5	5
	4	256000	Upper Bound	397000			249000	Upper Bound	586200			383000	Upper Bound	609500				Virkon®	4	4	5
	5	274000	Lower Bound	21000			550000	Lower Bound	-313000			485000	Lower Bound	5500				DNA Remover®	4	4	5
UV	1	17000	Q1	25000	29640	8644.25	4500	Q1	5240	21308	15774.8	27400	Q1	42900	49660	16807.8		Trigene®	5	4	4
	2	25000	Q3	35600			5240	Q3	33400			42900	Q3	55900				Sodium hypochlorite	4	4	5
	3	32300	IQR	10600			24900	IQR	28160			49000	IQR	13000				Background controls	3	3	3
	4	35600	Upper Bound	51500			33400	Upper Bound	75640			55900	Upper Bound	75400
	5	38300	Lower Bound	9100			38500	Lower Bound	-37000			73100	Lower Bound	23400
EtOH+UV	1	1110	Q1	2080	4530	3678.38	12500	Q1	13500	14475	1987.25	5290	Q1	9930	13624	6104.35
	2	2080	Q3	5830			13500	Q3	17100			9930	Q3	19200
	3	3330	IQR	3750			14800	IQR	3600			14200	IQR	9270				Table S3.3. Summarising table with the mean and standard deviation per category in mtDNA copies as well as the yield in % of DNA from blood left on the surface compared to the no-treatment controls. The data is presented with outliers removed.
	4	5830	Upper Bound	11455			17100	Upper Bound	22500			19200	Upper Bound	33105
	5	10300	Lower Bound	-3545			32300	Lower Bound	8100			19500	Lower Bound	-3975				Blood	PLASTIC			METAL			WOOD
Fresh bleach	1	25600	Q1	76300	131380	91357.2	0	Q1	452	4028	5141.62	5560	Q1	19400	20465	13005.9		Cleaning agent	Mean	SD	Yield	Mean	SD	Yield	Mean	SD	Yield
	2	76300	Q3	159000			452	Q3	11100			19400	Q3	37300				No-treatment controls	720000*	66144		607667*	345048		469333*	150111
	3	129000	IQR	82700			4560	IQR	10648			19600	IQR	17900				EtOH	198200***	67277	0.275278	170078***	235148	0.279886	330600***	108933	0.704403
	4	159000	Upper Bound	283050			11100	Upper Bound	27072			37300	Upper Bound	64150				UV	29640***	8644	0.0411667	21308***	15775	0.0350653	49660***	16808	0.10581
	5	267000	Lower Bound	-47750			28800	Lower Bound	-15520			86900	Lower Bound	-7450				EtOH+UV	4530***	3678	0.00629167	14475**	1987	0.0238206	13624***	6104	0.0290284
Stored bleach	1	2190	Q1	13100	26898	24457.3	0	Q1	710	2117.5	2527.03	43.6	Q1	3620	5003.33	1220.83		Fresh bleach	131380***	91357	0.182472	4028**	5124	0.00662863	20465**	13006	0.0436044
	2	13100	Q3	34600			710	Q3	5680			3620	Q3	5930				Stored bleach	26898***	24457	0.0373583	2118**	2527	0.00348464	5003*	1221	0.0106605
	3	19300	IQR	21500			2080	IQR	4970			5460	IQR	2310				DAX Ytdesinfektion Plus	131880***	81201	0.183167	154488***	145119	0.254231	425000***	58151	0.90554
	4	34600	Upper Bound	66850			5680	Upper Bound	13135			5930	Upper Bound	9395				Virkon®	5824***	7503	0.00808889	395**	790	0.000650027	160**	321	0.000341442
	5	65300	Lower Bound	-19150			27100	Lower Bound	-6745			19800	Lower Bound	155				DNA Remover®	128060***	89646	0.177861	260000**	121290	0.427866	0**	0	0
DAX Ytdesinf, Plus	1	41400	Q1	74000	131880	81200.8	1440	Q1	16000	154488	145119	356000	Q1	383000	425000	58150.7		Trigene®	5598**	1517	0.007775	42775**	28180	0.0703922	16960***	7688	0.0361364
	2	74000	Q3	157000			16000	Q3	248000			383000	Q3	460000				Sodium hypochlorite	42310***	28842	0.0587639	79700**	75524	0.131157	15618**	19392	0.0332759
	3	136000	IQR	83000			172000	IQR	232000			425000	IQR	77000				Background controls	15*	26		37*	65		354*	352
	4	157000	Upper Bound	281500			248000	Upper Bound	596000			460000	Upper Bound	575500
	5	251000	Lower Bound	-50500			335000	Lower Bound	-332000			501000	Lower Bound	267500				NOTE - number of replicates used for calculating the mean
Virkon®	1	0	Q1	0	5824	7503.32	0	Q1	0	395	790	0	Q1	0	160.25	320.5		*	3 replicates
	2	0	Q3	11100			0	Q3	1580			0	Q3	641				**	4 replicates
	3	1620	IQR	11100			0	IQR	1580			0	IQR	641				***	5 replicates
	4	11100	Upper Bound	27750			1580	Upper Bound	3950			641	Upper Bound	1602.5
	5	16400	Lower Bound	-16650			8530	Lower Bound	-2370			1870	Lower Bound	-961.5
DNA Remover®	1	41300	Q1	81400	128060	89646.2	114000	Q1	208000	260000	121290	0	Q1	0	0	0
	2	81400	Q3	160000			208000	Q3	375000			0	Q3	0
	3	88600	IQR	78600			343000	IQR	167000			0	IQR	0				Table S3.4. Summarising table with the mean and standard deviation per category in mtDNA copies as well as the yield in % of DNA from blood left on the surface compared to the no-treatment controls. All data is included (no outliers removed).
	4	160000	Upper Bound	277900			375000	Upper Bound	625500			0	Upper Bound	0
	5	269000	Lower Bound	-36500			684000	Lower Bound	-42500			14300	Lower Bound	0				Blood	PLASTIC			METAL			WOOD
Trigene®	1	4790	Q1	4790	5597.5	1516.65	10600	Q1	37100	42775	28179.9	6800	Q1	14300	16960	7687.85		Cleaning agent	Mean	SD	Yield	Mean	SD	Yield	Mean	SD	Yield
	2	4790	Q3	7870			37100	Q3	79000			14300	Q3	22300				No-treatment controls	720000	66144		607667	345048		469333	150111
	3	4940	IQR	3080			44400	IQR	41900			14800	IQR	8000				EtOH	198200	67277	0.275278	170078	235148	0.2799	330600	108933	0.704403
	4	7870	Upper Bound	12490			79000	Upper Bound	141850			22300	Upper Bound	34300				UV	29640	8644	0.0411667	21308	15775	0.0351	49660	16808	0.10581
	5	17200	Lower Bound	170			193000	Lower Bound	-25750			26600	Lower Bound	2300				EtOH+UV	4530	3678	0.00629167	18040	8155.24	0.0297	13624	6104	0.0290284
Sodium hypochlorite	1	9750	Q1	15300	42310	28842.2	11000	Q1	17800	79700	75523.7	2090	Q1	7530	15617.5	19392.5		Fresh bleach	131380	91357	0.182472	8982.4	11939.7	0.0148	33752	31774	7,19%*
	2	15300	Q3	56400			17800	Q3	149000			7530	Q3	44400				Stored bleach	26898	24457	0.0373583	7114	11384.8	0.0117	6970.72	7536.05	0.0149
	3	52700	IQR	41100			141000	IQR	131200			8450	IQR	36870				DAX Ytdesinfektion Plus	131880	81201	0.183167	154488	145119	0.2542	425000	58151	0.90554
	4	56400	Upper Bound	118050			149000	Upper Bound	345800			44400	Upper Bound	99705				Virkon®	5824	7503	0.00808889	2022	3701.85	0.0033	502.2	813.443	0.0011
	5	77400	Lower Bound	-46350			424000	Lower Bound	-179000			481000	Lower Bound	-47775				DNA Remover®	128060	89646	0.177861	344800	216769	56,74%*	2860	6395.15	0.0061
Background controls			Q1	0	15.1	26.154		Q1	0	37.3333	64.6632		Q1	168.95	354.3	352.283		Trigene®	7918	5352.45	0.011	72820	71477.9	11,98%*	16960	7688	0.0361364
	1	45.3	Q3	22.65			112	Q3	56			314	Q3	519.5				Sodium hypochlorite	42310	28842	0.0587639	148560	167291	24,45%*	108694	208802	23,16%*
	2	0	IQR	22.65			0	IQR	56			725	IQR	350.55				Background controls	15	26		37	65		354	352
	3	0	Upper Bound	56.625			0	Upper Bound	140			23.9	Upper Bound	1045.32
			Lower Bound	-33.975				Lower Bound	-84				Lower Bound	-356.875				* Difference between data with and without outliers were observed.
